# Supplementary material for: Electrochemical hole injection into the valence band of thiol stabilised CdTe quantum dots
Source: Royal Society of Chemistry journal article supplement (doi:10.1039/b910127f), 2009-01-01
Supplement: b910127f.pdf [file b910127f.pdf]

## Supplementary information for

# Electrochemical hole-injection into the valence band of thiol stabilised CdTe quantum dots

Gabriela P. Kissling<sup>a</sup> and David J. Fermín<sup>a\*</sup>

### S1 TEM of as-synthesised CdTe QDs.

TEM micrograph of CdTe particles grown for a period of 24 hrs as described in the experimental section. The micrograph was obtained with a HRTEM JEOL TEM 2010 fitted with a Kodak Electron Image Film SO-163. Lattice fringes can be observed, confirming the nanocrystalline nature of the dots.

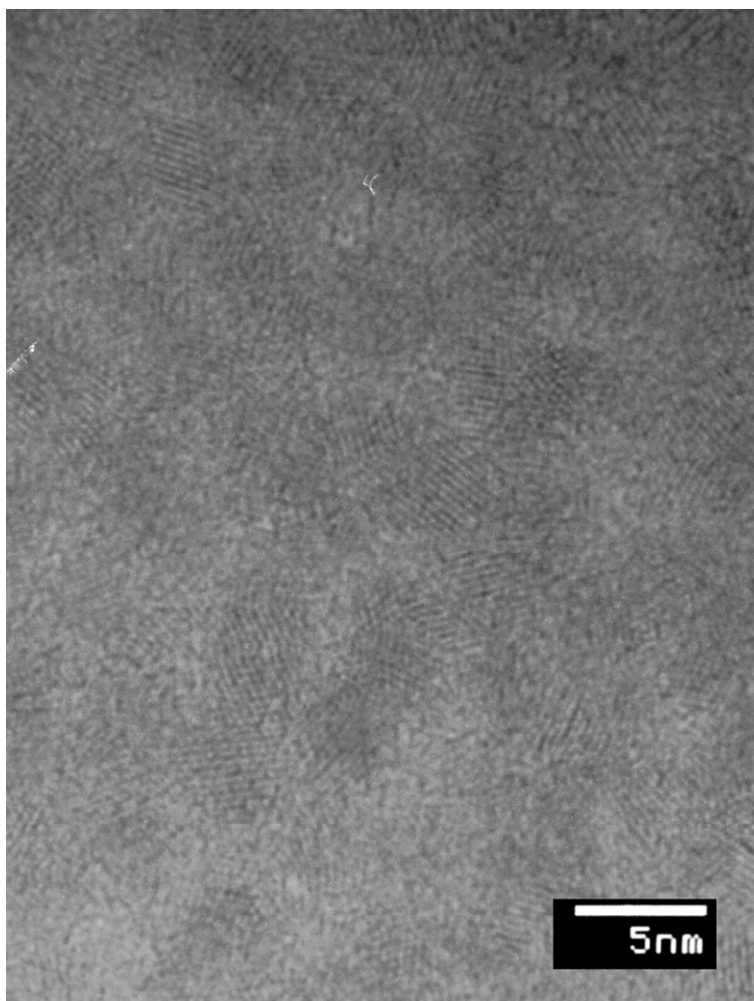

Fig. S1 TEM of as-synthesised 3.1 nm CdTe QDs.
